# Supplementary material for: Silicon coupled-resonator optical-waveguide-based biosensors using light-scattering pattern recognition with pixelized mode-field-intensity distributions
Source: PubMed Central journal article supplement — Sci Rep. 2014 Dec 18;4:7528. doi: 10.1038/srep07528 (PMC4269880; doi:10.1038/srep07528), 2014-12-18
Supplement: srep07528-s1.pdf [file srep07528-s1.pdf]

# **Silicon coupled-resonator optical-waveguide-based biosensors using light-scattering pattern recognition with pixelized mode-field-intensity distributions**

Jiawei Wang, Zhanshi Yao, Ting Lei and Andrew W. Poon

## **Supplementary information**

### **S1. Numerical calculations of coupling coefficient and effective refractive index values for transfer-matrix modeling**

We model the imperfect CROWs using transfer-matrix method. We use as modeling parameters the numerically calculated values of coupling coefficient,  $\kappa$ , and effective refractive index,  $n_{\text{eff}}$ , from finite-element method (FEM) and two-dimensional (2D) finite-difference time-domain (FDTD) simulations. The waveguide dimensions of the microring CROWs considered in the simulations are based on the statistics of the measured waveguide widths and coupling gap widths from our SEM characterization (see section S2) of a representative fabricated CROW device. We assume a fixed waveguide height of 240 nm following the silicon layer thickness of the SOI wafer. We consider only the TM polarization.

Fig. S1(a) shows the numerically calculated linear relationship between the waveguide width of interest and  $n_{\text{eff}}$  (assuming a water upper-cladding with a refractive index of 1.318). Fig. S1(b) shows the numerically calculated linear relationship between the cladding refractive index of interest and  $n_{\text{eff}}$  (assuming a waveguide width of 470 nm). We use the relationship,  $\Delta n_{\text{eff}}/\Delta n \sim 0.45$ , shown in Fig. S1(b) to relate the change in effective refractive index,  $\Delta n_{\text{eff}}$ , used in the transfer-matrix modeling with the change in cladding refractive index,  $\Delta n$ .

Fig. S1(c) shows the FDTD-simulated electric mode-field amplitude profile of a coupling region (assuming a directional coupler with an interaction length of 3.5  $\mu\text{m}$ , with no cavity enhancement), with a coupling gap width of 119 nm.

Fig. S1(d) shows the numerically calculated linear relationship between the coupling gap spacing and  $\kappa$ . We extract the  $\kappa$  values from the calculated electric mode-field amplitude profiles, as shown in Fig. S1(c). We note that  $\kappa$  increases with the coupling gap spacing because the designed interaction length of 3.5  $\mu\text{m}$  slightly exceeds the coupling length of the directional coupler for a coupling gap spacing of 119 nm.

## S2. Statistics of the measured waveguide widths and coupling gap widths

Figs. S2(a) and (b) show the statistics of the measured waveguide widths and coupling gap widths over one representative fabricated CROW device. We can approximately fit both distributions by Gaussian functions. The waveguide width,  $W_{wg}$ , shows a mean value of  $469.9 \pm 1.6$  nm. The coupling gap width,  $W_{gap}$ , shows a mean value of  $119.1 \pm 1.3$  nm. In both distributions, the uncertainties are given by the standard deviations. Figs. S2(c)-(k) show the zoom-in-view SEM images of all the nine coupling regions along the CROW counting from the input-port to the drop-port.

## S3. Validity of the sensing algorithm using only the principal and second-principal components

We demonstrate by modeling that our sensing algorithm using only the  $\rho^p$  and  $\rho^s$  values can uniquely extract the  $\Delta n$  value for  $N$  up to at least 28. Here, we show our modeling results assuming  $N = 28$ . We assume a strong inter-cavity coupling, given by  $\kappa = 0.910 \pm 0.004$ , and an effective refractive index, given by  $n_{eff} = 1.839 \pm 0.002$ , following the same statistics detailed in section S2. We assume a waveguide loss of 2.2 dB/cm. Fig. S3(a) shows the modeled transmission spectra of an imperfect 28-element microring CROW. Fig. S3(b) shows the 28 modeled eigenstate pixelized patterns. Fig. S3(c) shows the calculated  $\{\rho_j'(\lambda_0)\}$  as a function of  $\Delta n$ , with  $\Delta n_d = 6.204 \times 10^{-2}$  RIU and  $\Delta n_i = 1.2 \times 10^{-4}$  RIU. Fig. S3(d) shows the calculated differential correlation coefficients per unit  $\Delta n$ , given as  $(d(\rho'(\lambda_0))/d(\Delta n))$ . Fig. S3(e) shows the modeled sensitivity as a function of  $\lambda_p$ . The sensitivity spans a range from  $12 \text{ RIU}^{-1}$  to  $1664 \text{ RIU}^{-1}$  over the spectral 3dB-bandwidth, with an average sensitivity of  $\sim 370 \text{ RIU}^{-1}$ .

We arbitrarily choose a fixed probe wavelength  $\lambda_p$  at 1558.18 nm (Fig. S3(a)). Fig. S4 illustrates the sensing scheme using the correlation analysis. Fig. S4(a) shows the modeled pixelized patterns at  $\lambda_p$  without (buffer) and with (test) applying a  $\Delta n$  that is arbitrarily chosen as  $1.80 \times 10^{-3}$  RIU. Fig. S4(b) shows the two sets of modeled correlation coefficients of the two pixelized patterns without and with  $\Delta n$ . The  $\rho^p$  and  $\rho^s$  without  $\Delta n$  are  $\rho_8$  and  $\rho_{12}$ , respectively. The  $\rho^p$  and  $\rho^s$  with  $\Delta n$  are  $\rho_8$  and  $\rho_{27}$ , respectively. Fig. S4(c) shows the calculated library of  $\rho_8'$  and  $\rho_{12}'$  as a function of  $\Delta n$  and mapping of  $\rho_8$  and  $\rho_{12}$  values for the buffer to the library. Fig. S4(d) shows the calculated library of  $\rho_8'$  and  $\rho_{27}'$  as a function of  $\Delta n$  and mapping of  $\rho_8$  and  $\rho_{27}$  values for the test to the library. We extract from the library a  $\Delta n = \Delta n_B' - \Delta n_B = 1.80 \times 10^{-3}$  RIU, which agrees with the chosen  $\Delta n$  value.

#### **S4. Correcting the measured pixelized patterns against surface-roughness-induced modulations**

The as-measured pixelized patterns are prone to be distorted by the non-uniform surface-roughness-induced scattering. In order to correct for such an image distortion, we normalize the measured pixelized patterns with estimated surface-roughness-induced modulations. We estimate the modulations by calculating the root-mean-square (RMS) value for each integration window in a pixelized pattern. The extracted RMS value is normalized to the integrated intensity value of each pixel. Fig. S5(a) shows the as-measured pixelized eigenstate patterns. Fig. S5(b) shows the estimated intensity-normalized RMS distributions for the eigenstate patterns. Fig. S5(c) shows the corrected pixelized eigenstate patterns, as shown in Fig. 5(c) in the main article.

#### **S5. Calibrated spectral sensitivity of the CROW sensor**

We calibrate the spectral sensitivity of the CROW sensor in the spectral domain using NaCl solutions with known mass concentrations (from 1% to 5%, with a step of 1%) covering the CROW device surface. Fig. S6 shows the measured linear relationship between the transmission band spectral shifts and the  $\Delta n$  values upon different concentrations. The linear fit indicates a  $\sim 0.19$  nm spectral redshift per 1% concentration increment. For NaCl solutions of 1% to 10% concentrations, the refractive index change in the 1550 nm wavelength range is known to be 0.0018 RIU per 1%<sup>1</sup>. Therefore, the CROW sensor exhibits a spectral sensitivity of  $\sim 106.82$  nm/RIU in 1550 nm.

#### **S6. Sensing performance comparison with waveguide- and microresonator-based refractive-index sensors in the spectral domain**

We first compare the sensing performances of our CROW sensor with traditional waveguide-based refractive index sensors. Table S1 summarizes the performances of recently demonstrated on-chip waveguide-based refractive index sensors. We use a waveguide-based sensor without cavity resonant enhancement as a baseline device for sensitivity comparison. Usually, such a sensor works in a Mach-Zehnder interferometer (MZI) configuration. The sensitivity is given as<sup>2</sup>

$$S_{MZI} = \frac{L_s}{\lambda} \frac{\Delta n_{eff}}{\Delta n} (2\pi \text{ RIU}^{-1}) \quad (1)$$

where  $\Delta n_{eff}$  is the change in effective refractive index,  $\Delta n$  is the cladding refractive index change,  $L_s$  is the length of the sensing waveguide, and  $\lambda$  is the wavelength in vacuum.

Assuming the same waveguide dimension design in the TM mode as we adopted for the CROW sensor, and the same ratio of  $\Delta n_{eff}/\Delta n \sim 0.45$  (see section S1), we compare the theoretically calculated sensitivity of the MZI

sensor defined in equation (1) with the modeled sensitivity of the CROW sensor (given by the larger differential correlation coefficient between  $\rho^p(\lambda_p)$  and  $\rho^s(\lambda_p)$ ). For a MZI sensor with the same sensing waveguide length as our designed 8-ring CROW total circumference length ( $\sim 382.7 \mu\text{m}$ ), the calculated sensitivity is  $\sim 110 (2\pi \text{RIU}^{-1})$ . This value falls with the range of the modeled sensitivity values of the CROW sensor ( $\sim 1.6 - \sim 715 \text{RIU}^{-1}$ ).

We also benchmark with the experimentally demonstrated sensitivity values from previous works using waveguide-based sensors in the MZI configuration<sup>3,4</sup>. Specifically, previous works using a spiral sensing waveguide with a few-mm length in a single-mode<sup>3</sup> or slot-mode<sup>4</sup> waveguide configuration have demonstrated sensitivity values of  $\sim 460 (2\pi \text{RIU}^{-1})$  and  $\sim 932 (2\pi \text{RIU}^{-1})$ , respectively. Both are comparable to the average sensitivity of  $\sim 199 \text{RIU}^{-1}$  and the peak sensitivity of  $\sim 1412 \text{RIU}^{-1}$  demonstrated in this work.

For microresonator-based sensors in the spectral domain, the sensitivity is defined as an absolute value of the resonance wavelength shift corresponding to the cladding refractive index change<sup>5-10</sup>. We caution that it cannot be directly compared with the sensitivity defined for the CROW sensor in the spatial domain. Instead, it is possible to benchmark on the detection limit. Previous works on microresonator-based sensors in the spectral domain using various material platforms<sup>5-10</sup> have shown a detection limit down to  $\sim 10^{-4} - \sim 10^{-7} \text{RIU}$ . Our demonstrated NEDL at  $\sim 6 \times 10^{-6} \text{RIU}$  at a specific probe wavelength is thus within the detection limit demonstrated by microresonator-based sensors in the spectral domain.

## **S7. Optimizing the CROW sensitivity**

We investigate the sensitivity of the imperfect CROW sensors as a function of different device parameters, including the waveguide propagation loss  $\alpha$ , the number of coupled cavities  $N$ , and the inter-cavity coupling coefficient  $\kappa$  based on the transfer-matrix modeling. We fix the same cavity circumference ( $47.8 \mu\text{m}$ ) following our experiments and assume that the same degree of imperfection can be generally applied.

### **S7.1 Optimizing the sensitivity by tuning the waveguide propagation loss**

Here we first show two specific cases of different waveguide losses assuming  $N = 16$ . Figs. S7(a)-(e) show the modeling results assuming a waveguide propagation loss of 22 dB/cm following our experiments. Figs. S8(a)-(e) show the modeling results assuming a waveguide propagation loss of 2.2 dB/cm following the typical SOI waveguide loss value reported in the literature<sup>11,12</sup>.

Fig. S7(a) shows the modeled transmission spectra with 16 eigenstates. Fig. S7(b) shows the modeled 16 distinguishable eigenstate pixelized patterns. Figs. S7(c) and (d) show the modeled library of  $\{\rho_j'(\lambda_0)\}$  as a function of  $\Delta n$ , and the calculated differential correlation coefficients per unit  $\Delta n$ , given as  $(d(\rho_j'(\lambda_0))/d(\Delta n))$ . Fig. S7(e) shows the extracted sensitivity as a function of  $\lambda_p$ . We observe an overall improved sensitivity compared to an 8-element CROW, with an average sensitivity of  $\sim 307 \text{ RIU}^{-1}$ .

Fig. S8(a) shows the modeled transmission spectra with 16 eigenstates, assuming a reduced waveguide loss. Fig. S8(b) shows the modeled 16 distinguishable eigenstate pixelized patterns. Figs. S8(c) and (d) show the modeled library of  $\{\rho_j'(\lambda_0)\}$  as a function of  $\Delta n$  and the calculated differential correlation coefficients per unit  $\Delta n$ , given as  $(d(\rho_j'(\lambda_0))/d(\Delta n))$ . Fig. S8(e) shows the extracted sensitivity as a function of  $\lambda_p$ . We observe an overall improvement sensitivity with an average sensitivity of  $\sim 375 \text{ RIU}^{-1}$ , compared to the above case upon a 22dB/cm waveguide loss. This suggests that the sensitivity increases with a reduced  $\alpha$ .

### **S7.2 Optimizing the sensitivity by tuning the number of coupled cavities**

We systematically study the sensitivity as a function of  $N$ , assuming  $\kappa \sim 0.91$  and  $\alpha = 2.2 \text{ dB/cm}$ . We examine from 4 to 28, following the same procedures as above. For each CROW, we obtain an average sensitivity over the entire transmission band. For each  $N$ , we repeat the calculation 200 times by generating different device parameters following section S2. We obtain from the randomly generated devices 200 average sensitivity values, and the mean value and the uncertainty out of the 200 devices. Our modeling results indicate that the sensitivity of the imperfect CROW sensor increases with  $N$  before saturation and then rolls off. Fig. S9(a) shows that the average sensitivity reaches the optimized value of  $\sim 364 \text{ RIU}^{-1}$  for  $N = 16$ . Therefore, the sensitivity can be optimized by increasing  $N$  to reach a saturation value.

### **S7.3 Optimizing the sensitivity by tuning the inter-cavity coupling coefficients**

We studied the sensitivity as a function of  $\kappa$ , assuming  $N = 8$  and  $\alpha = 2.2 \text{ dB/cm}$ . We examine  $\kappa$  from 0.3 to 0.9. Our modeling results indicate that the sensitivity of the imperfect CROW sensor drops with increasing  $\kappa$ . Fig. S9(b) shows that the average sensitivity reaches the maximum value of  $\sim 633 \text{ RIU}^{-1}$  at  $\kappa \approx 0.3$ , with a reduced  $\Delta n_d \approx 1.7 \times 10^{-2} \text{ RIU}$ .

Given a low waveguide propagation loss (2.2dB/cm) and a low coupling coefficient ( $\sim 0.3$ ), we further studied the optimized sensitivity as a function of  $N$ . The modeling results in Fig. S9(c) reveal an optimized average sensitivity of  $\sim 641 \text{ RIU}^{-1}$  at  $N = 12$ .

## References

- 1 Lide, D. R. CRC Handbook of Chemistry and Physics 2005 [Lide, D. R. (ed.)] [1308] (CRC Press, Boca Raton, 2005).
- 2 Schmid, J. et al. Silicon-on-insulator guided mode resonant grating for evanescent field molecular sensing *Opt. Express*, **17**, 18371-18380 (2009).
- 3 Densmore, A. et al. Spiral-path high-sensitivity silicon photonic wire molecular sensor with temperature independent response. *Opt. Lett.* **33**, 596-598 (2008).
- 4 Liu, Q. et al. Highly sensitive Mach-Zehnder interferometer biosensor based on silicon nitride slot waveguide. *Sensor Actuat. B - Chem.* **188**, 681-688 (2013).
- 5 Iqbal, M. et al. Label-free biosensor arrays based on silicon ring resonators and high-speed optical scanning instrumentation. *IEEE J. Sel. Top. Quant. Electron.* **16**, 654-661 (2010).
- 6 Barrios, C. A. et al. Slot-waveguide biochemical sensor. *Opt. Lett.* **32**, 3080-3082 (2007).
- 7 Claes, T. et al. Label-free biosensing with a slot-waveguide-based ring resonator in silicon on insulator. *IEEE Photon J.* **1**, 197-204 (2009).
- 8 Zamora, V., Lützow, P., Weiland, M. & Pergande, D. Investigation of cascaded SiN microring resonators at 1.3  $\mu\text{m}$  and 1.5  $\mu\text{m}$ . *Opt. Express* **21**, 27550-27557 (2013).
- 9 Hu, J. et al. Planar waveguide-coupled, high-index-contrast, high Q resonators in chalcogenide glass for sensing. *Opt. Lett.* **33**, 2500-2502 (2008).
- 10 Stern, L., Goykhman, I., Desiatov, B. & Levy, U. Frequency locked micro disk resonator for real time and precise monitoring of refractive index. *Opt. Lett.* **37**, 1313-1315 (2012).
- 11 Selvaraja, S. K. et al., Highly uniform and low-loss passive silicon photonics devices using a 300mm CMOS platform. Paper presented at Optical Fiber Communication Conference, San Francisco, California United States. Washington, DC United States: OSA Technical Digest. (2014, March 9-13)
- 12 OpSIS-IME, [Online]. Available: <http://www.opsisfoundry.org>

## Tables and Figures for Supplementary Information

**Table S1:** Summary of on-chip optical waveguide- and microresonator-based refractive-index sensor performances

| Configuration                             | Material                       | Length/<br>Cavity<br>length ( $\mu\text{m}$ ) | Q-factor                                  | Sensitivity<br>(RIU <sup>-1</sup> ) | Detection limit<br>(RIU)                                                                    | Ref | Year |
|-------------------------------------------|--------------------------------|-----------------------------------------------|-------------------------------------------|-------------------------------------|---------------------------------------------------------------------------------------------|-----|------|
| MZI with spiral waveguide                 | SOI                            | 2000                                          | NA                                        | 460 ( $2\pi$ )                      | $1.1 \times 10^{-5}$                                                                        | 3   | 2008 |
| MZI with slot-mode waveguide              | SiN                            | 7000                                          | NA                                        | 932 ( $2\pi$ )                      | $5.4 \times 10^{-6}$                                                                        | 4   | 2013 |
| Microring                                 | SOI                            | $\sim 94$                                     | $4.3 \times 10^4$                         | 163 nm                              | -                                                                                           | 5   | 2010 |
| Microring with slot-waveguide             | Si <sub>3</sub> N <sub>4</sub> | $\sim 430$                                    | 1800                                      | 212 nm                              | $2.3 \times 10^{-4}$                                                                        | 6   | 2007 |
| Microring with slot-waveguide             | SOI                            | $\sim 41$                                     | $\sim 450$                                | 298 nm                              | $4.2 \times 10^{-5}$                                                                        | 7   | 2009 |
| Cascaded rings with Vernier scale         | SiN                            | $\sim 3700$<br>(2 rings)                      | $10^4$                                    | 9804 nm                             | $2.04 \times 10^{-6}$                                                                       | 8   | 2013 |
| Microdisk                                 | Chalcogenide Glass             | $\sim 126$                                    | $2 \times 10^5$                           | 182 nm                              | $8 \times 10^{-7}$                                                                          | 9   | 2008 |
| Microdisk                                 | SiN                            | $\sim 188$                                    | $10^4$                                    | -                                   | $10^{-7}$                                                                                   | 10  | 2012 |
| CROW in the spatial domain<br>(This work) | SOI                            | $\sim 382$<br>(8 rings)                       | $\sim 914 - \sim 2176$<br>(8 eigenstates) | 5 - 1412                            | $\sim 9 \times 10^{-4} - \sim 2 \times 10^{-7}$<br>( $\sim 6 \times 10^{-6}$ at 1565.56 nm) | -   | 2014 |

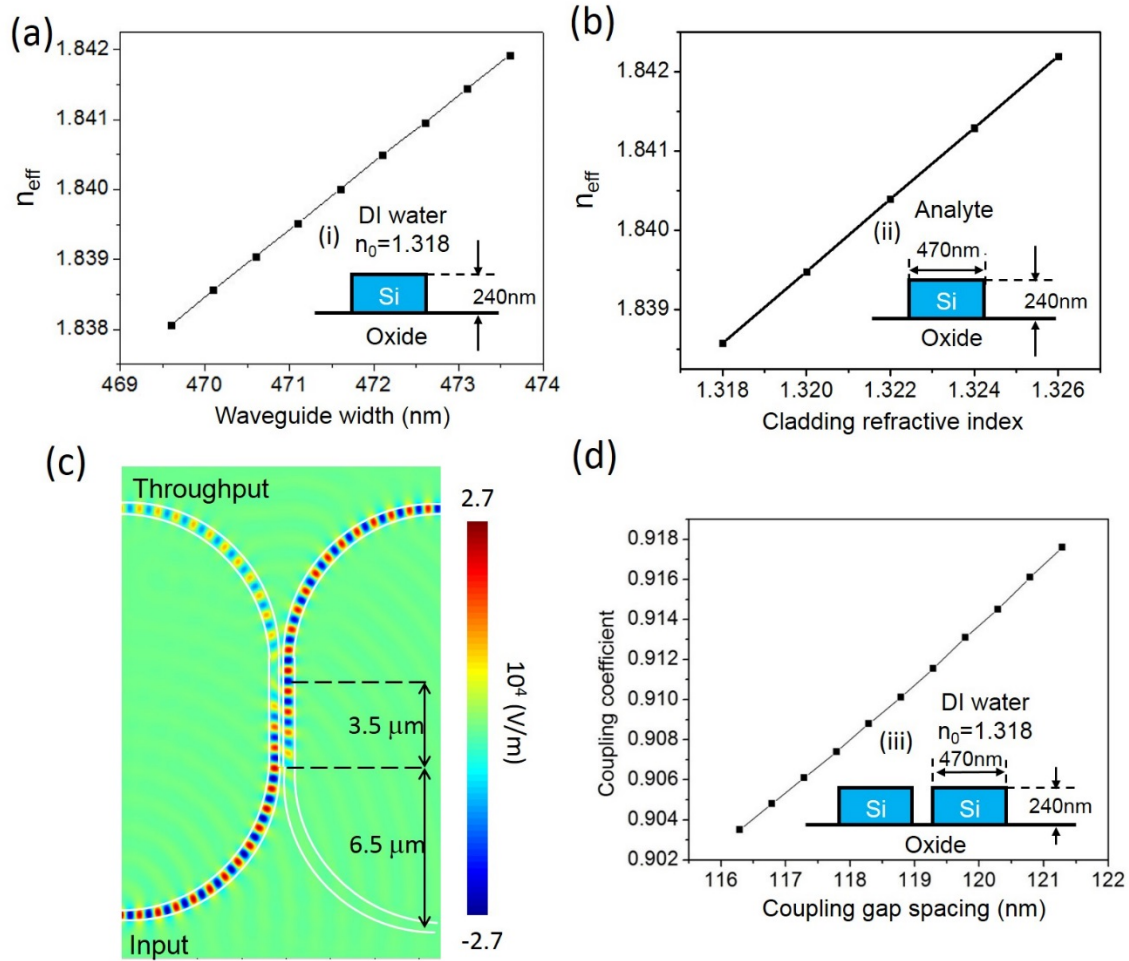

**Fig. S1** (a) Simulated relationship between the waveguide width and  $n_{\text{eff}}$ . (b) Simulated relationship between the cladding refractive index and  $n_{\text{eff}}$ . (c) Simulated electric mode-field amplitude profile of a coupling region with a coupling gap width of 119 nm. (d) Simulated relationship between the coupling gap width and the coupling coefficient. Insets (i)-(iii): Schematics of the waveguide cross-sectional views for the simulations in (a), (b), (d), respectively.



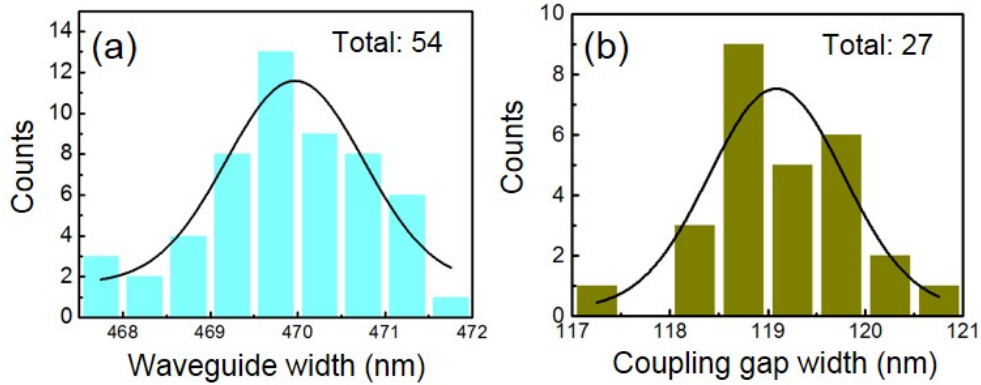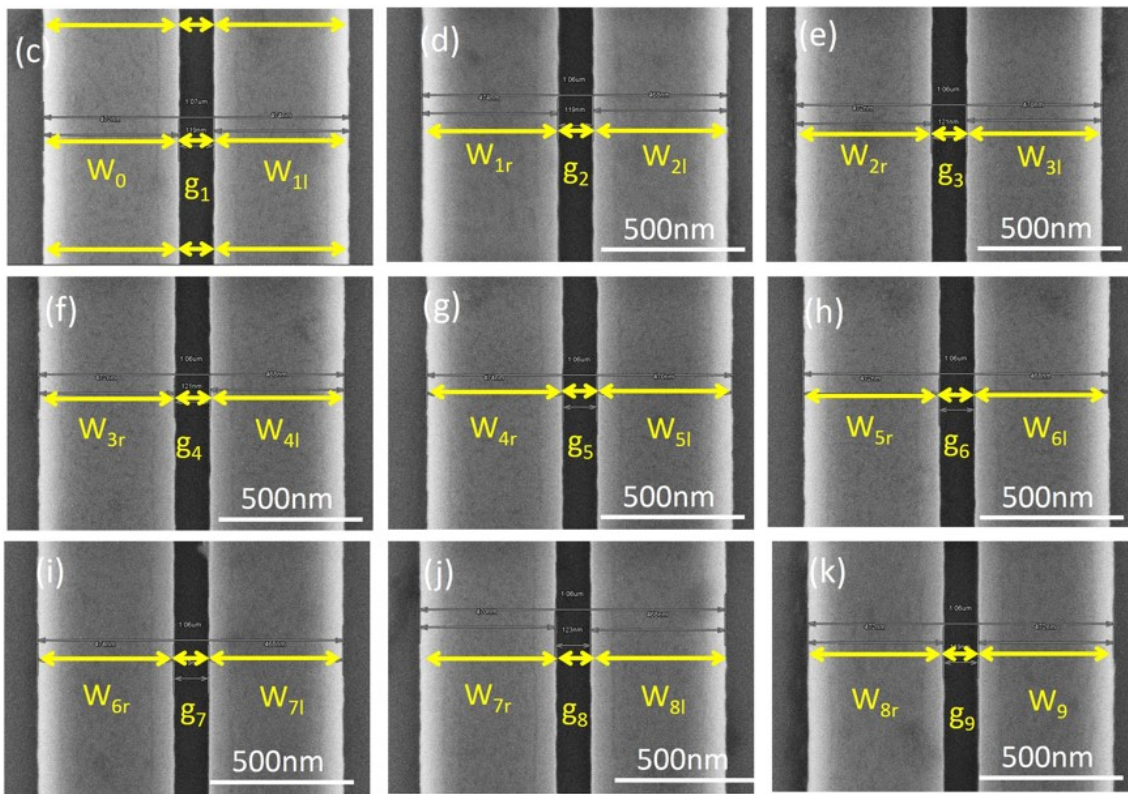

**Fig. S2** (a)-(b) Statistics of the measured waveguide widths with a Gaussian fit. (b) Statistics of the measured coupling gap widths with a Gaussian fit. (c)-(k) Representative SEM images in the nine coupling regions of an imperfect CROW. The three sets of yellow arrows indicate where we obtain the three sets of waveguide widths and gap widths in a coupling region. Number 1 – 8 in the subscript of “W” denotes the ring cavity number (counting from the input side). Number 1 – 9 in the subscript of “g” denotes the gap spacing number (counting from the input side). The “l” and “r” in the subscript of “W” denote the width measurement at the left and right waveguide of the microring, respectively.

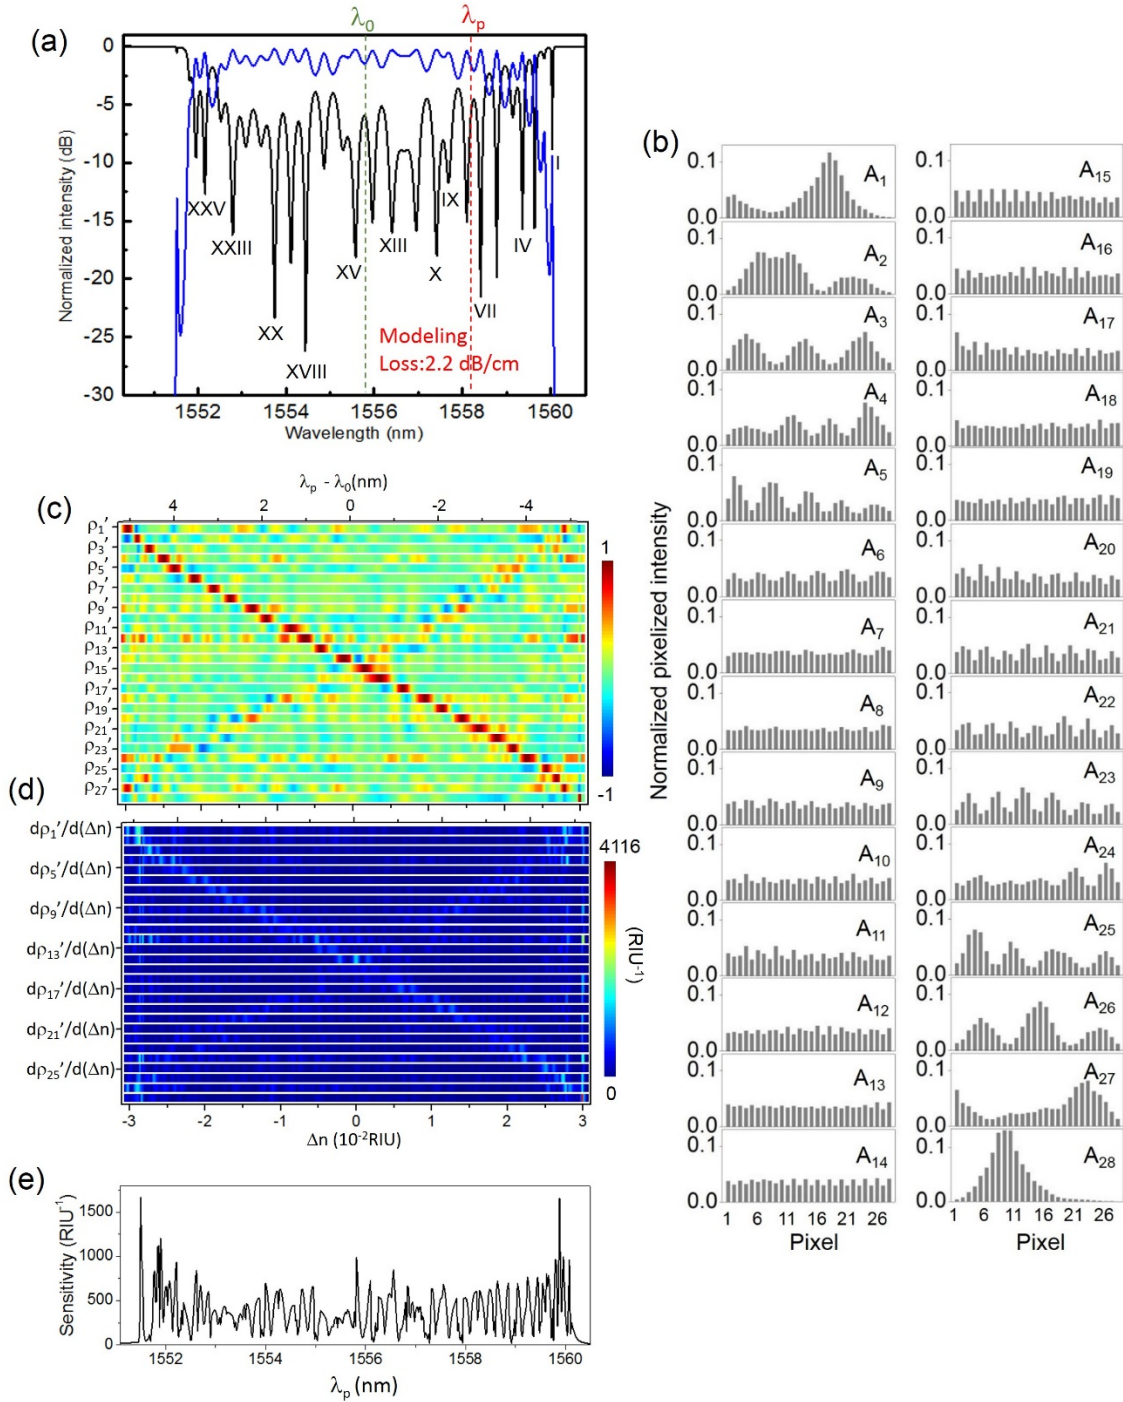

**Fig. S3** (a) Modeled throughput- and drop-port transmission spectra of an imperfect 28-ring CROW. Green dashed line: reference wavelength  $\lambda_0$  of 1555.82 nm. Red dashed line: probe wavelength  $\lambda_p$  of 1558.18 nm. (b) Modeled pixelized intensity patterns at eigenstates I - XXVIII. (c) Calculated library of the correlation coefficients  $\rho_{1'}$  -  $\rho_{28'}$  as a function of  $\Delta n$  at  $\lambda_0$ . (d) Calculated library of differential correlation coefficients as a function of  $\Delta n$ . (e) Calculated sensitivity as a function of  $\lambda_p$ .

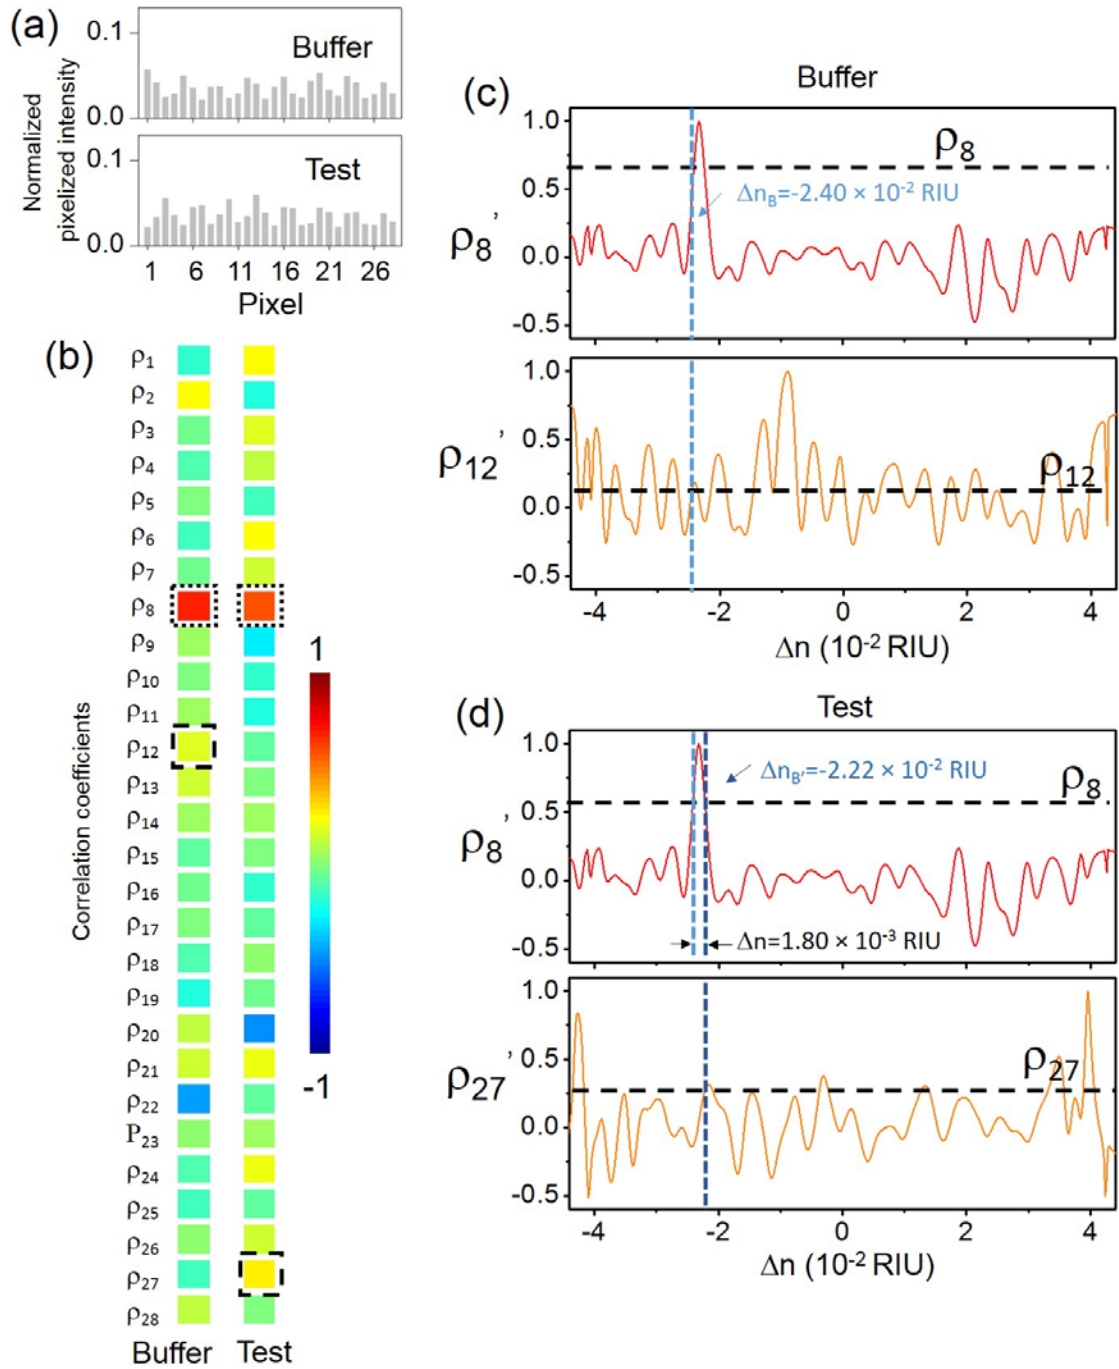

**Fig. S4** (a) Modeled pixelized patterns at probe wavelength  $\lambda_p$  (1558.18nm) upon the buffer solution and the test solution. (b) Calculated sets of correlation coefficients upon the buffer solution and the test solution. The dotted-line boxes indicate  $\rho^p$  and the dashed-line boxes indicate  $\rho^s$ . (c) The calibrated  $\rho_8'$  and  $\rho_{12}'$  as a function of  $\Delta n$  and mapping of  $\rho_8$  and  $\rho_{12}$  values to extract  $\Delta n_B$ . (d) The calibrated  $\rho_8'$  and  $\rho_{27}'$  as a function of  $\Delta n$  and mapping of  $\rho_8$  and  $\rho_{27}$  values to extract  $\Delta n_B$ .

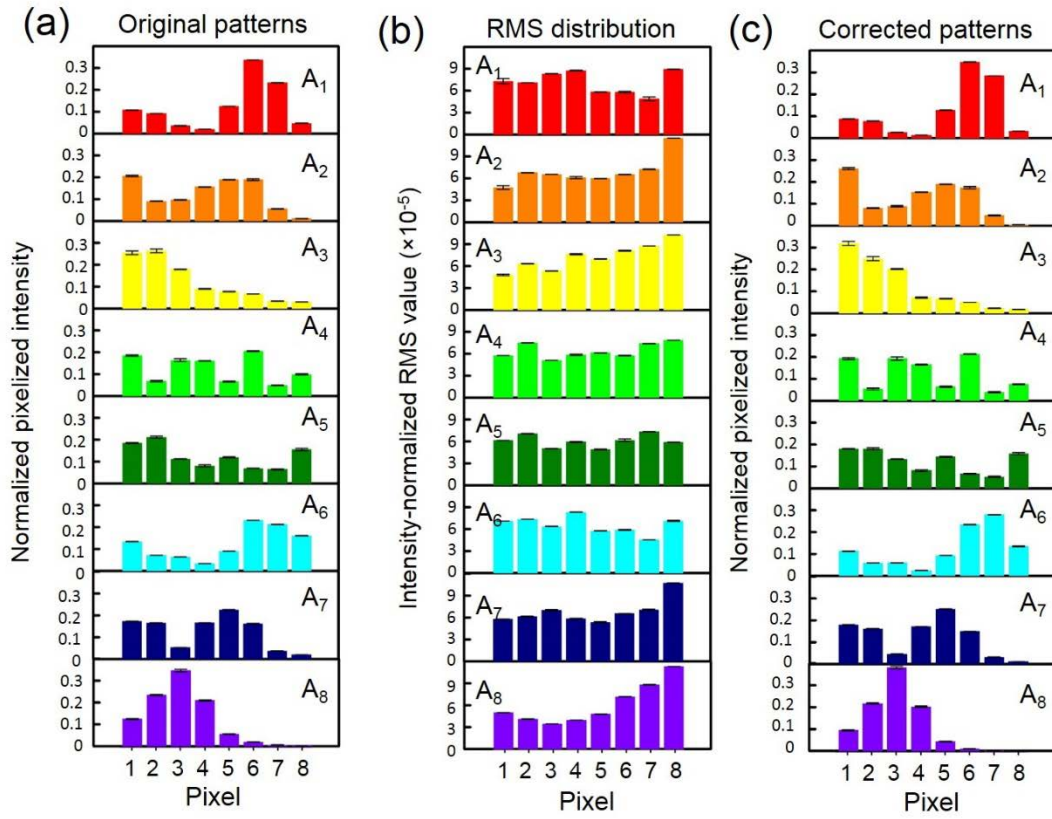

**Fig. S5** (a) As-measured pixelized eigenstate patterns. (b) Intensity-normalized RMS distributions for the eigenstates I-VIII. (c) Corrected pixelized eigenstate patterns, same as Fig. 5 (c) in the main article.

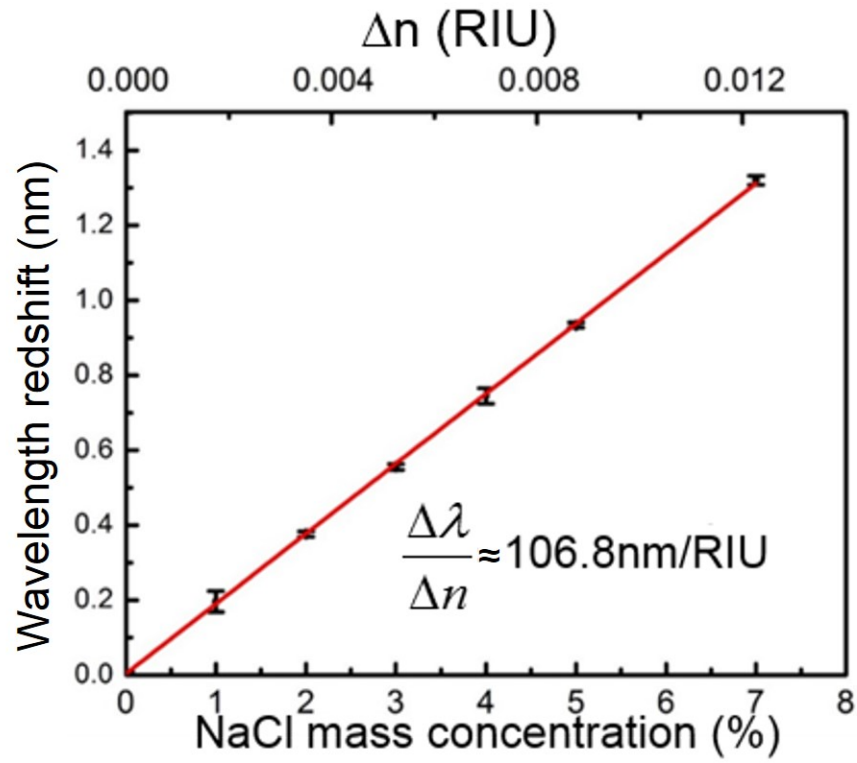

Fig. S6 Measured and fitted linear relationship between the resonance wavelength shifts and the refractive index change in the cladding layer with various NaCl mass concentrations.

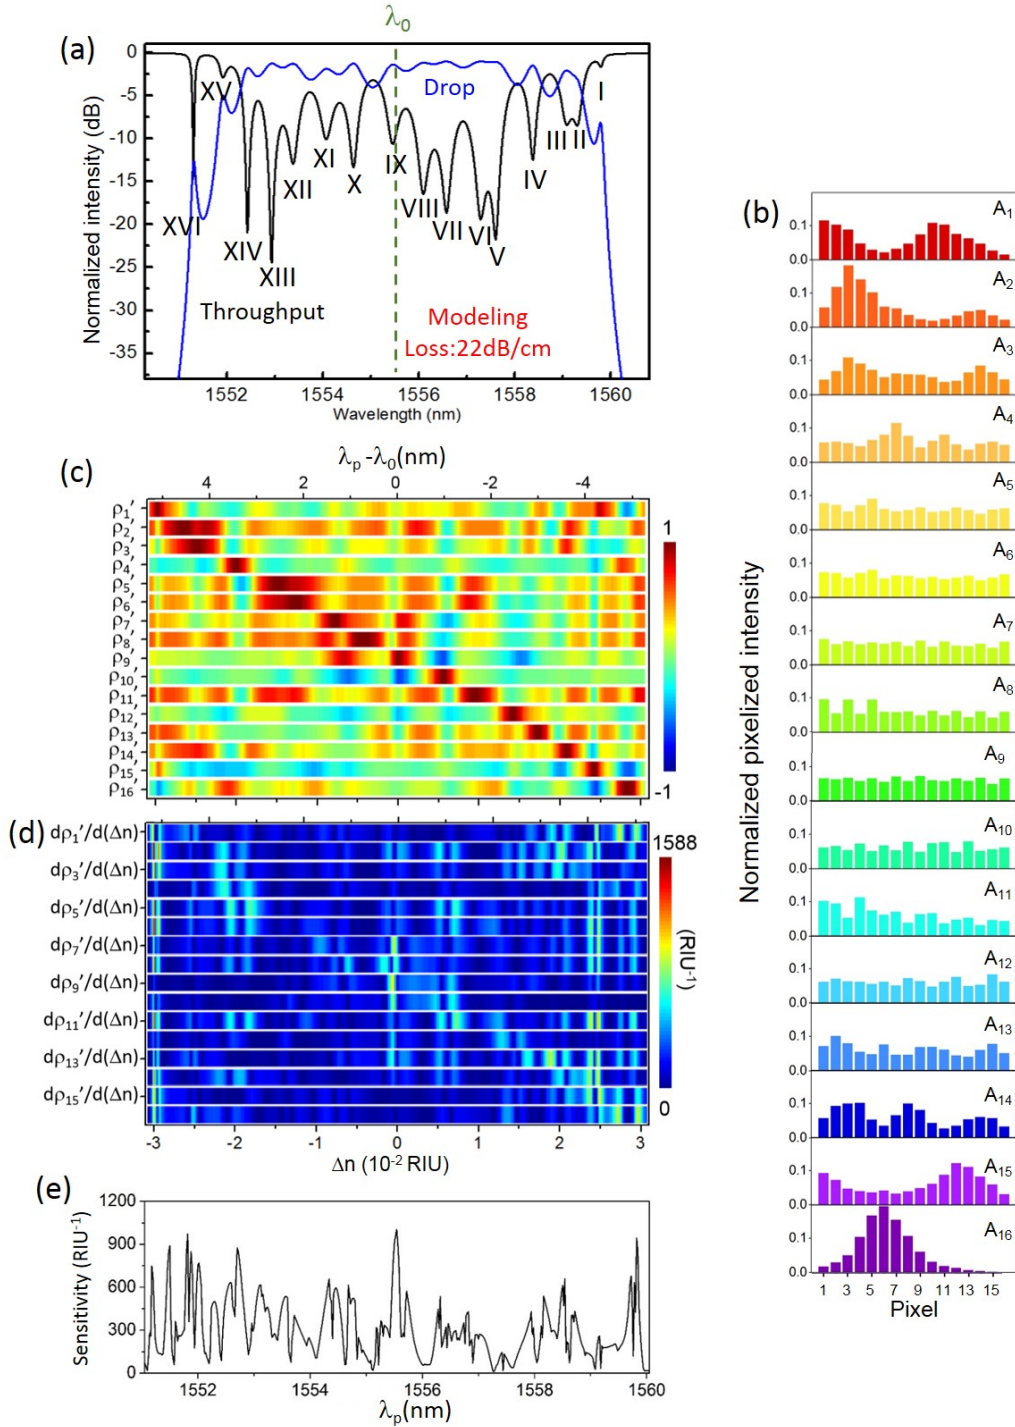

**Fig. S7** (a) Modeled throughput- and drop-port transmission spectra of an imperfect 16-ring CROW assuming a waveguide loss of 22 dB/cm. Green dashed line: reference wavelength  $\lambda_0$  of 1555.54 nm. (b) Modeled pixelized intensity patterns at eigenstates I-XVI. (c) Calculated library of the correlation coefficients  $\rho_i'$ - $\rho_{16}'$  as a function of  $\Delta n$  at a fixed reference wavelength  $\lambda_0$ . (d) Calculated library of differential correlation coefficients as a function of  $\Delta n$ . (e) Calculated sensitivity as a function of  $\lambda_p$ .

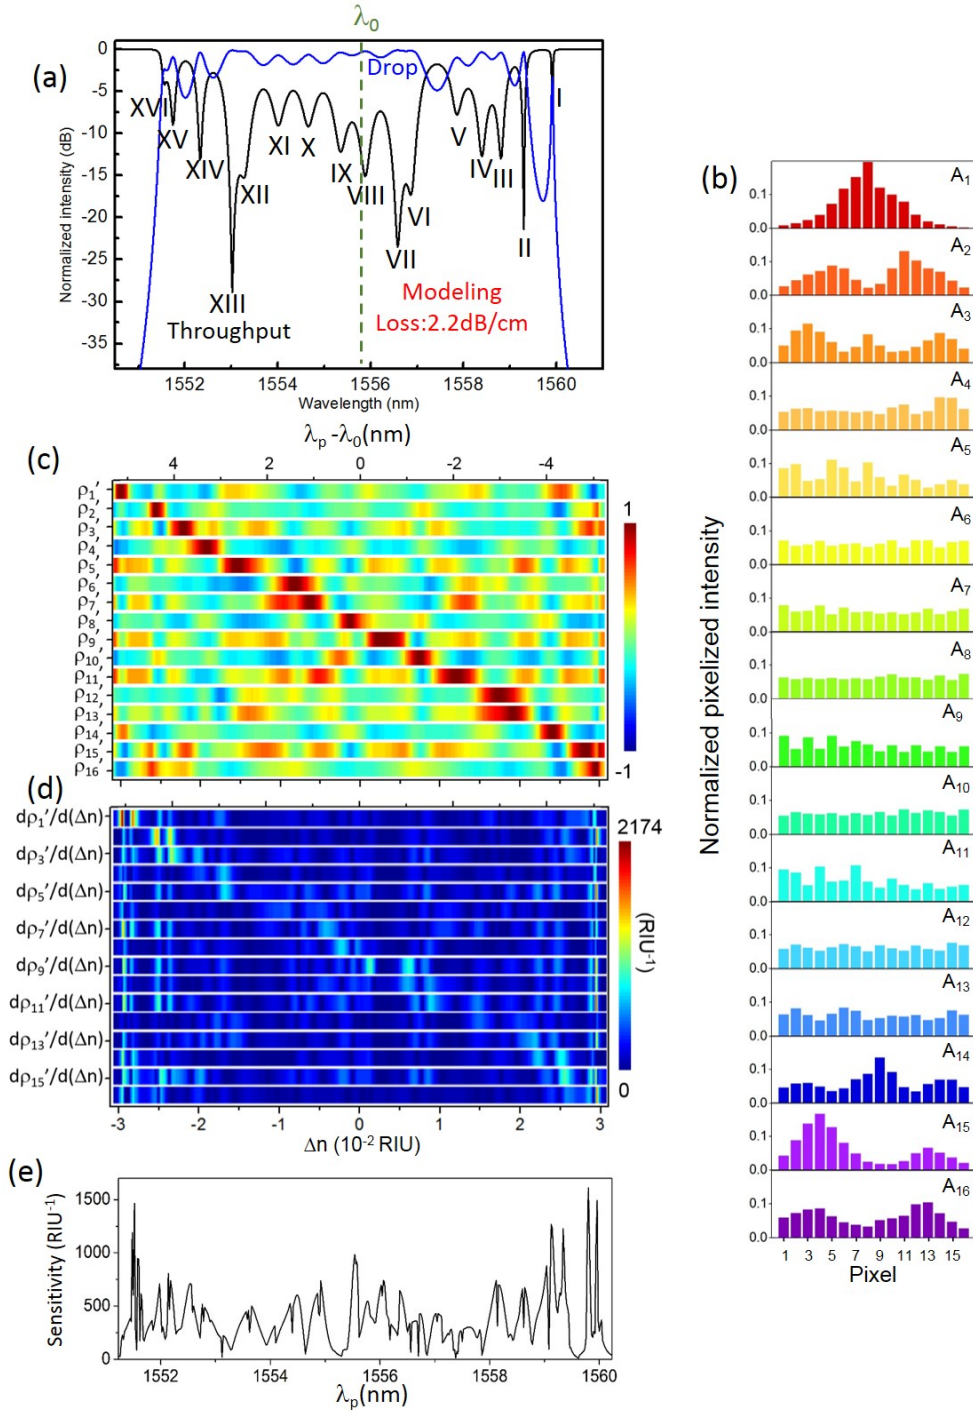

**Fig. S8** (a) Modeled throughput- and drop-port transmission spectra of an imperfect 16-ring CROW assuming a waveguide loss of 2.2dB/cm. Green dashed line: reference wavelength  $\lambda_0$  of 1555.74 nm. (b) Modeled pixelized intensity patterns at eigenstates I-XVI. (c) Calculated library of the correlation coefficients  $\rho_1'$ - $\rho_{16}'$  as a function of  $\Delta n$  at a fixed reference wavelength  $\lambda_0$ . (d) Calculated library of differential correlation coefficients as a function of  $\Delta n$ . (e) Calculated sensitivity as a function of  $\lambda_p$ .

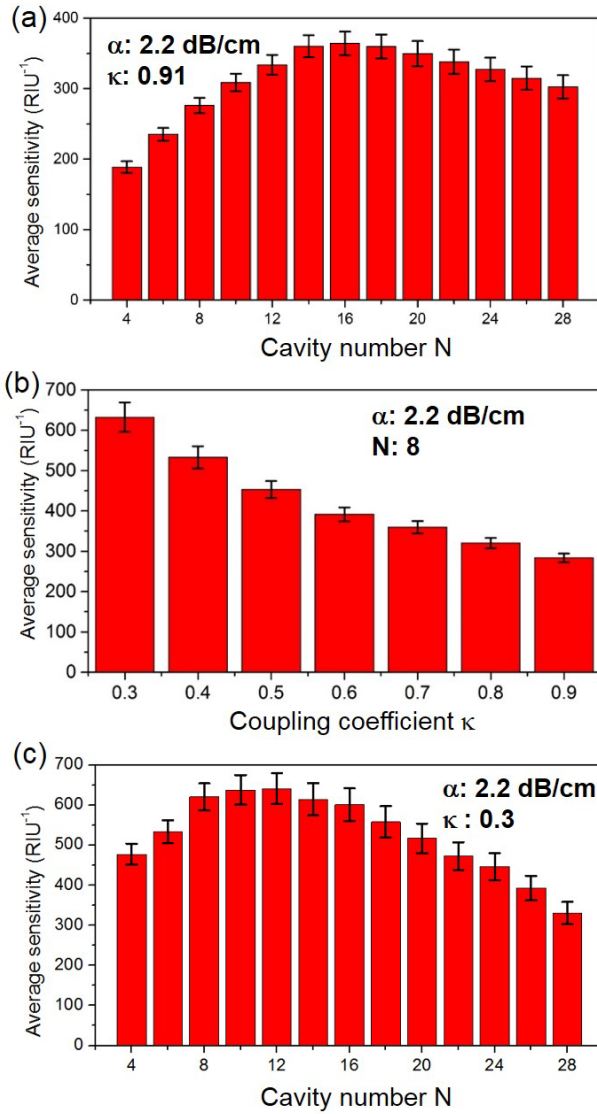

**Fig. S9** (a) Modeled average sensitivity of the CROW as a function of cavity number assuming a coupling coefficient  $\sim 0.91$  and a waveguide propagation loss of 2.2 dB/cm. (b) Modeled average sensitivity of the CROW as a function of coupling coefficient assuming a cavity number of 8 and a waveguide loss of 2.2 dB/cm. (c) Modeled average sensitivity of the CROW as a function of cavity number assuming a coupling coefficient  $\sim 0.3$  and a waveguide loss of 2.2 dB/cm.
